# Supplementary material for: Radial nerve palsy associated with closed humeral shaft fractures: a systematic review of 1758 patients
Source: Springer Nature journal article supplement (doi:10.1007/s00402-020-03446-y), 2020-04-13
Supplement: MOESM3 [file 17888702]

**Appendix C Study characteristics**

| Authors                             | Year | Closed fractures | Male | Mean age | Follow-up mean (months) | Total radial nerve palsy | Primary radial nerve palsy (recovered) | Secondary radial nerve palsy (recovered) | Intervention(s)                     |
|-------------------------------------|------|------------------|------|----------|-------------------------|--------------------------|----------------------------------------|------------------------------------------|-------------------------------------|
| An et al. <sup>30</sup>             | 2012 | 34               | 23   | 37       | 22                      | 0                        | excluded                               | 0                                        | MIPO vs. IMN                        |
| An et al. <sup>48</sup>             | 2010 | 33               | 21   | 37       | 29                      | 5                        | excluded                               | 5 (5)                                    | MIPO vs. Plating                    |
| Apivatthakakul et al. <sup>31</sup> | 2009 | 20               | *    | *        | 14                      | 0                        | excluded                               | 0                                        | MIPO                                |
| Arora et al. <sup>41</sup>          | 2011 | 60               | *    | *        | 3                       | 3                        | excluded                               | 3 (*)                                    | Plating                             |
| Balam et al. <sup>8</sup>           | 2014 | 37               | 33   | 28       | 18                      | 2                        | excluded                               | 2 (2)                                    | MIPO                                |
| Belayneh et al. <sup>9</sup>        | 2019 | 98               | 46   | 49       | 7                       | 8                        | 8 (8)                                  | 0                                        | Non-operative treatment vs. Plating |
| Brunner et al. <sup>32</sup>        | 2012 | 14               | 7    | 64       | 25                      | 0                        | excluded                               | 0                                        | MIPO                                |
| Chao et al. <sup>33</sup>           | 2005 | 92               | 53   | 51       | 71                      | 9                        | 6 (6)                                  | 3 (3)                                    | Plating vs. Nailing                 |
| Concha et al. <sup>34</sup>         | 2010 | 20               | *    | *        | 12                      | 0                        | 0                                      | 0                                        | MIPO                                |
| Dielwart et al. <sup>10</sup>       | 2017 | 71               | 41   | 38       | 4                       | 15                       | 15 (13)                                | 0                                        | Non-operative vs. Plating or IMN    |
| Duygun et al. <sup>11</sup>         | 2017 | 24               | 12   | 42       | 24                      | 1                        | 0                                      | 1 (1)                                    | IMN                                 |
| Ebrahimipour et al. <sup>12</sup>   | 2015 | 41               | 34   | 39       | 12                      | 4                        | 3 (3)                                  | 1 (1)                                    | Nailing                             |
| Ekhholm et al. <sup>47</sup>        | 2008 | 27               | 9    | 51       | 76                      | 6                        | 6 (6)                                  | 0                                        | Non-operative, Plating, IMN         |
| Fan et al. <sup>13</sup>            | 2015 | 60               | 37   | 39       | 12                      | 3                        | excluded                               | 3 (3)                                    | Plating vs. IMN                     |
| Galluci et al. <sup>14</sup>        | 2015 | 20               | 12   | 38       | 22                      | 1                        | 0                                      | 1 (1)                                    | MIPO                                |
| Habernek et al. <sup>49</sup>       | 1992 | 10               | 7    | *        | 3                       | 0                        | 0                                      | 0                                        | IMN                                 |
| Han et al. <sup>15</sup>            | 2017 | 96               | 56   | 43       | 31                      | 2                        | excluded                               | 2 (2)                                    | IMN vs. IMN with cerclage cables    |
| Jawa et al. <sup>35</sup>           | 2006 | 40               | 20   | 45       | 21                      | 9                        | 6 (5)                                  | 4 (2)                                    | Non-operative vs. Plating           |
| Kharbanda et al. <sup>16</sup>      | 2017 | 18               | 12   | 44       | 26                      | 2                        | 2 (2)                                  | 0                                        | Plating                             |
| Ko et al. <sup>17</sup>             | 2017 | 50               | 34   | 56       | 19                      | 3                        | Excluded                               | 3 (3)                                    | MIPO                                |
| Lau et al. <sup>36</sup>            | 2007 | 17               | 7    | 65       | 14                      | 3                        | excluded                               | 3 (3)                                    | MIPO                                |

|                                 |      |     |     |    |    |    |          |       |                          |
|---------------------------------|------|-----|-----|----|----|----|----------|-------|--------------------------|
| Lee et al. <sup>18</sup>        | 2018 | 18  | 10  | 35 | 12 | 4  | 4 (4)    | 0     | Plating                  |
| Li et al. <sup>42</sup>         | 2011 | 45  | 32  | 38 | 12 | 3  | excluded | 3 (3) | Plating vs. IMN          |
| Liebergall et al. <sup>37</sup> | 1997 | 19  | *   | *  | 36 | 3  | 3 (2)    | 0     | IMN                      |
| Lin et al. <sup>38</sup>        | 2003 | 16  | 8   | 40 | 22 | 2  | 2 (2)    | 0     | IMN                      |
| Livani et al. <sup>43</sup>     | 2004 | 11  | 9   | 41 | 27 | 0  | 0        | 0     | MIPO                     |
| Malhan et al. <sup>44</sup>     | 2012 | 42  | 28  | 34 | 25 | 1  | excluded | 1 (0) | MIPO                     |
| Matsunaga et al. <sup>19</sup>  | 2017 | 110 | 73  | 39 | 12 | 2  | excluded | 2 (2) | Non-operative vs. MIPO   |
| Pal et al. <sup>20</sup>        | 2015 | 49  | 26  | 40 | 41 | 6  | 6 (5)    | 0     | Non-operative            |
| Pehlivan et al. <sup>45</sup>   | 2002 | 21  | 17  | 25 | 9  | 0  | 0        | 0     | Non-operative            |
| Salvador et al. <sup>21</sup>   | 2018 | 60  | 18  | 67 | 11 | 2  | excluded | 2 (2) | IMN with cerclage cables |
| Seo et al. <sup>22</sup>        | 2019 | 60  | 40  | 44 | 12 | 13 | 9 (9)    | 4 (4) | Plating                  |
| Shen et al. <sup>27</sup>       | 2013 | 43  | 28  | 40 | 26 | 1  | excluded | 1 (1) | MIPO                     |
| Singh et al. <sup>23</sup>      | 2014 | 212 | 148 | 37 | 12 | 25 | 18 (18)  | 7 (7) | Plating                  |
| Spagnolo et al. <sup>39</sup>   | 2010 | 16  | 10  | 54 | 7  | 0  | 0        | 0     | MIPO                     |
| Wang et al <sup>24</sup>        | 2018 | 46  | 14  | 71 | 17 | 0  | Excluded | 0     | Plating                  |
| Yang et al. <sup>40</sup>       | 2012 | 19  | 15  | 37 | 17 | 1  | 0        | 1 (1) | Plating                  |
| Yin et al. <sup>25</sup>        | 2014 | 56  | 30  | 38 | 16 | 3  | excluded | 3 (3) | Plating                  |
| Zhiquan et al. <sup>46</sup>    | 2007 | 13  | 9   | 38 | 13 | 0  | excluded | 0     | MIPO                     |
| Zogaib et al. <sup>26</sup>     | 2014 | 20  | 15  | 35 | 52 | 0  | 0        | 0     | MIPO                     |

\* Unknown value

MIPO = Minimally invasive plate osteosynthesis

IMN = Intramedullary nailing
