# Supplementary material for: Radial nerve palsy associated with closed humeral shaft fractures: a systematic review of 1758 patients
Source: Arch Orthop Trauma Surg. 2020 Apr 13;141(4):561–8. doi: 10.1007/s00402-020-03446-y (PMC7966639; doi:10.1007/s00402-020-03446-y)
Supplement: Supplementary file 1 — Supplementary file1 (PDF 105 kb) [file 402_2020_3446_MOESM1_ESM.pdf]

**Appendix A Coleman Methodology Score**

| Section                                                                                                                 | Number or factor                                                                        | Score |
|-------------------------------------------------------------------------------------------------------------------------|-----------------------------------------------------------------------------------------|-------|
| Part A. Only one score to be given for each section                                                                     |                                                                                         |       |
| 1. Study size: number of patients                                                                                       | <20                                                                                     | 0     |
|                                                                                                                         | 20-40                                                                                   | 4     |
|                                                                                                                         | 41-60                                                                                   | 7     |
|                                                                                                                         | >60                                                                                     | 10    |
| 2. Mean follow-up                                                                                                       | < 12 months                                                                             | 0     |
|                                                                                                                         | 12-24 months                                                                            | 4     |
|                                                                                                                         | 25-36 months                                                                            | 7     |
|                                                                                                                         | > 36 months                                                                             | 10    |
| 3. Number of interventions per group<br>(e.g. minimally invasive plate<br>osteosynthesis or non-operative<br>treatment) | Different fixation techniques used, outcome not<br>reported separately                  | 0     |
|                                                                                                                         | Different fixation techniques used, outcome reported<br>separately                      | 7     |
|                                                                                                                         | Single fixation technique used                                                          | 10    |
|                                                                                                                         |                                                                                         |       |
| 4. Accuracy of diagnosis (location and/or<br>type)                                                                      | Location and type of fracture described                                                 | 5     |
|                                                                                                                         | Location or type of fracture described                                                  | 3     |
|                                                                                                                         | None described                                                                          | 0     |
| 5. Type of study                                                                                                        | Retrospective cohort                                                                    | 0     |
|                                                                                                                         | Prospective cohort study                                                                | 10    |
|                                                                                                                         | Randomized controlled trial                                                             | 15    |
| 6. Description of treatment given<br>(fracture treatment)                                                               | Adequate (technique stated and necessary details of<br>that type of procedure given)    | 10    |
|                                                                                                                         | Fair (technique only stated without elaboration)                                        | 5     |
|                                                                                                                         | Inadequate, not stated, or unclear                                                      | 0     |
| 7. Description of (postoperative)<br>rehabilitation                                                                     | Described                                                                               | 5     |
|                                                                                                                         | Not described                                                                           | 0     |
| Part B. Scores may be given for each option in each of the 3 sections if applicable                                     |                                                                                         |       |
| Outcome criteria                                                                                                        | Outcome measures clearly defined                                                        | 2     |
|                                                                                                                         | Timing of outcome assessment clearly stated                                             | 2     |
|                                                                                                                         | Use of outcome criteria that has reported reliability                                   | 3     |
|                                                                                                                         | Outcome with good sensitivity                                                           | 3     |
| Procedure for assessing outcomes                                                                                        | Participants actively recruited                                                         | 5     |
|                                                                                                                         | Investigator independent of surgeon                                                     | 4     |
|                                                                                                                         | Written assessment                                                                      | 3     |
|                                                                                                                         | Completion of assessment by patients themselves with<br>minimal investigator assistance | 3     |
| Description of subject selection process                                                                                | Selection criteria reported and unbiased                                                | 5     |
|                                                                                                                         | Recruitment rate reported > 90%                                                         | 5     |
|                                                                                                                         | Recruitment rate reported = 90%                                                         | 0     |
| Total score                                                                                                             |                                                                                         | 100   |
