# Supplementary material for: Radial nerve palsy associated with closed humeral shaft fractures: a systematic review of 1758 patients
Source: Arch Orthop Trauma Surg. 2020 Apr 13;141(4):561–8. doi: 10.1007/s00402-020-03446-y (PMC7966639; doi:10.1007/s00402-020-03446-y)
Supplement: Supplementary file 2 — Supplementary file2 (PDF 96 kb) [file 402_2020_3446_MOESM2_ESM.pdf]

---

**Appendix B** Extracted Data

---

**Data type**

---

|                                     |                                                                                                                                                                                                   |
|-------------------------------------|---------------------------------------------------------------------------------------------------------------------------------------------------------------------------------------------------|
| Study characteristics               | Authors last names, journal and year of publication.                                                                                                                                              |
| Study design                        | Randomized controlled trial, retrospective cohort study, prospective cohort study, case series                                                                                                    |
| Patient characteristics             | Mean age, sex, length of follow up                                                                                                                                                                |
| Type of fracture                    | Spiral, oblique, transverse, comminuted, segmental                                                                                                                                                |
| Type of fracture AO-classification  | 12A1, 12A2, 12A3, 12B1, 12B2, 12B3, 12C1, 12C2, 12C3                                                                                                                                              |
| Location of fracture                | Proximal, middle, distal                                                                                                                                                                          |
| Type of intervention                | Conservative treatment, operative treatment                                                                                                                                                       |
| Type of operative treatment         | Nailing, conventional plating, minimally invasive plate osteosynthesis                                                                                                                            |
| Exploration radial nerve            | Yes/no                                                                                                                                                                                            |
| Type of approach                    | Anterolateral (i.e. minimally invasive anterior, open anterolateral, open extended deltopectoral)<br>Posterior (i.e. open posterior, minimally invasive posterior)<br>Lateral (i.e. lateral open) |
| Primary radial nerve palsy          | Radial nerve palsy occurring at the onset of the fracture                                                                                                                                         |
| Secondary radial nerve palsy        | Radial nerve palsy occurring due to treatment or healing process.                                                                                                                                 |
| Recovery radial nerve palsy         | Recovery of primary or secondary radial nerve palsy without the need of a second intervention                                                                                                     |
| Time to recovery radial nerve palsy | Time to recovery of primary or secondary RNP in weeks                                                                                                                                             |

---
